# Supplementary material
Source: publisher figshare collection journal article supplement (https://gsajournals.figshare.com/ndownloader/files/20973672)
Supplement: Supplementary file 1 [file 20973672]

## Sheet: Table S6
Table S6	CEGMA summary
CEGMA (248)	#Prots	%Completeness	#Total	Average	%Ortho
Complete	198	79.84	339	1.71	46.46
Partial	227	91.53	479	2.11	65.2
